# Supplementary material
Source: bioRxiv or medRxiv preprint supplement (https://www.biorxiv.org/highwire/filestream/111771/field_highwire_adjunct_files/0/368175-1.pdf)
Supplement: Supplementary file [file 368175-1.pdf]

# Transcriptome analysis of Pv11 cells infers the mechanism of desiccation tolerance and recovery

Takahiro G Yamada<sup>1</sup>, Yoshitaka Suetsugu<sup>2,†</sup>, Ruslan Deviatiiarov<sup>3</sup>, Oleg Gusev<sup>3,4</sup>, Richard Cornette<sup>2</sup>, Alexander Nesselov<sup>3</sup>, Noriko Hiroi<sup>5</sup>, Takahiro Kikawada<sup>2,6,\*</sup>, and Akira Funahashi<sup>1,\*</sup>

<sup>1</sup>Department of Biosciences and Informatics, Keio University, Yokohama, Kanagawa, Japan, 223-8522

<sup>2</sup>Institute of Agrobiological Sciences, NARO, Tsukuba, Ibaragi, Japan, 305-8634

<sup>3</sup>Kazan Federal University, Kazan, Respublika Tatarstan, Russia, 420008

<sup>4</sup>RIKEN, Wako, Saitama, Japan, 351-0198

<sup>5</sup>Faculty of Pharmacy, Sanyo-onoda City University, Onoda, Yamaguchi, Japan, 756-0884

<sup>6</sup>Graduate School of Frontier Sciences, The University of Tokyo, Kashiwa, Chiba, Japan, 277-8562

\*kikawada@affrc.go.jp and funa@bio.keio.ac.jp

†Deceased

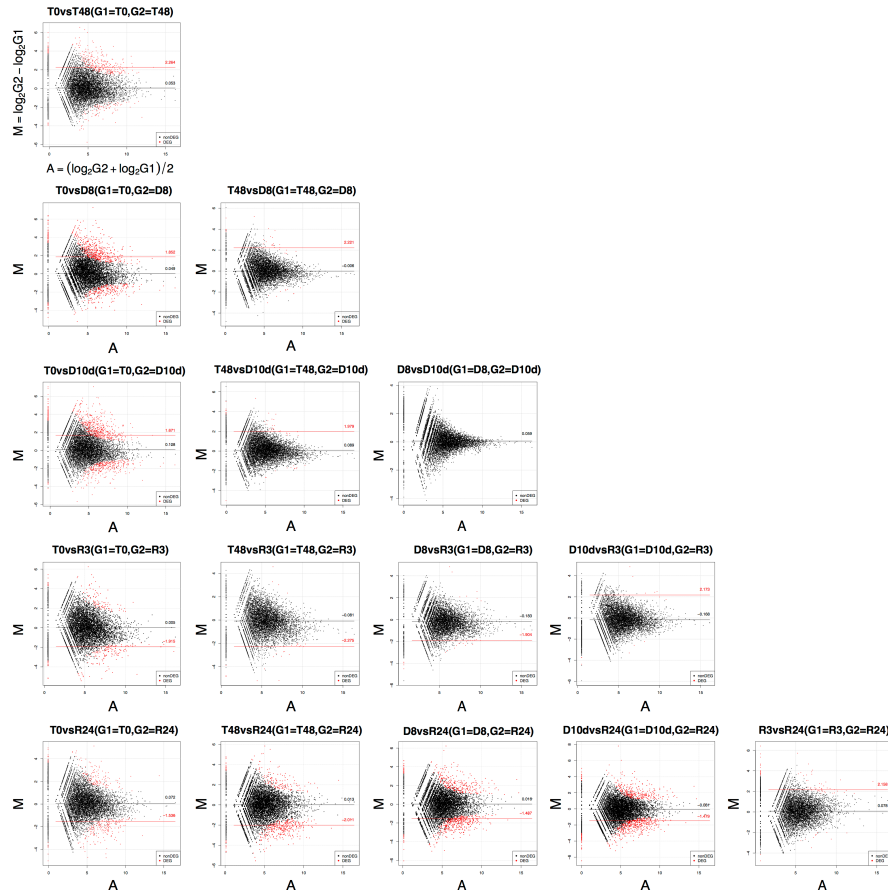

**Supplementary Figure S1.** M-A plots of DEGs for each pair of samples. The M value indicates the log ratio (sample group 2 (G2) relative to sample group 1 (G1)). The A value indicates the average expression of a gene in samples G1 and G2. The median M values are indicated by black lines for non-DEGs and red lines for DEGs.

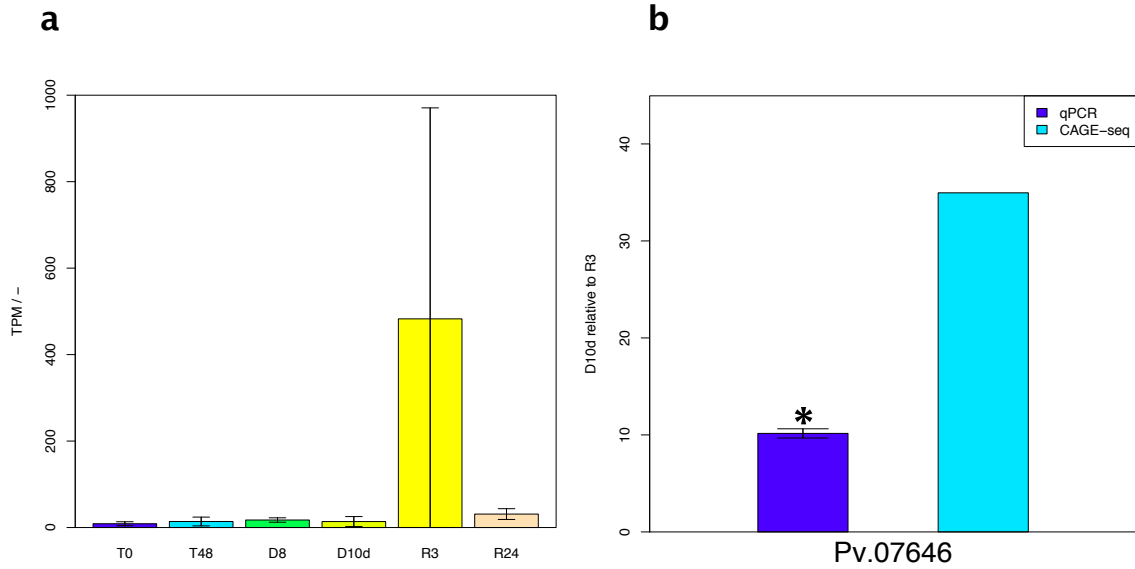

**Supplementary Figure S2.** The expression of Pv.07646 in each sample quantified by RNA-seq and RT qPCR. a) The expression of Pv.07646, annotated by GO:0036055 (protein-succinyllysine desuccinylase activity) and GO:0036049 (peptidyl-lysine desuccinylation). Horizontal axis shows sample names. TPM, tags per million. Data are mean  $\pm$  SD. b) Fold change from R3 to D10d as determined by RT qPCR and CAGE-seq. Asterisk means significant change by Welch's t test ( $p$ -value  $<$  0.05).

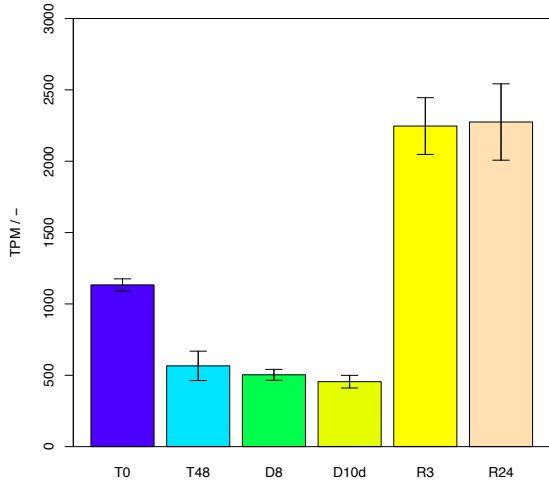

**Pv.01867**

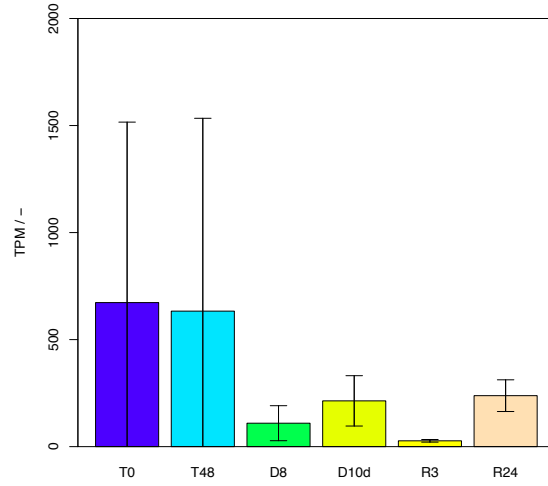

**Pv.04558**

**Supplementary Figure S3.** Expression of Pv.01867 and Pv.04558. Data are mean ± SD.

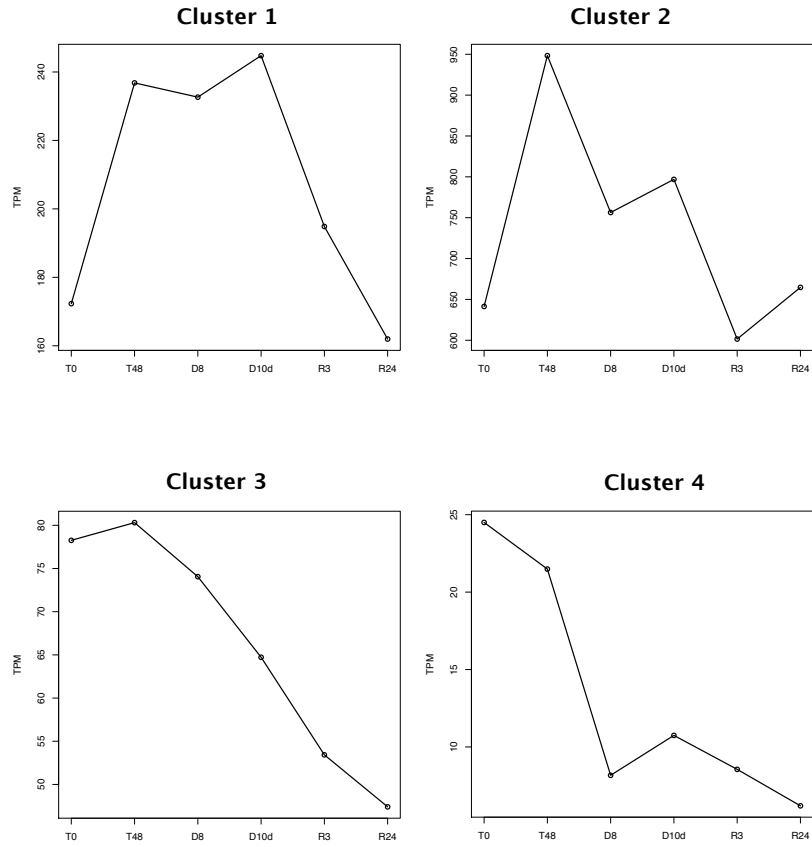

**Supplementary Figure S4.** Time course of the expression of DEGs annotated by GO:0008152 (metabolic process).

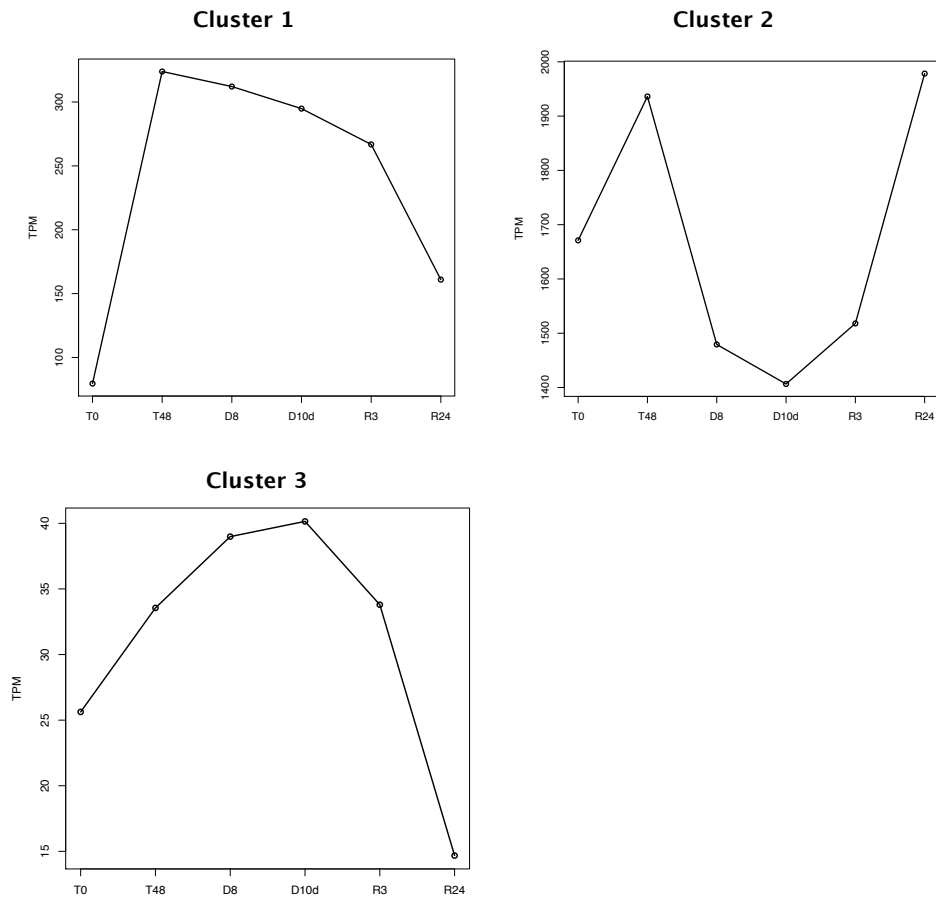

**Supplementary Figure S5.** Time course of the expression of DEGs annotated by GO:0055114 (oxidation-reduction process).

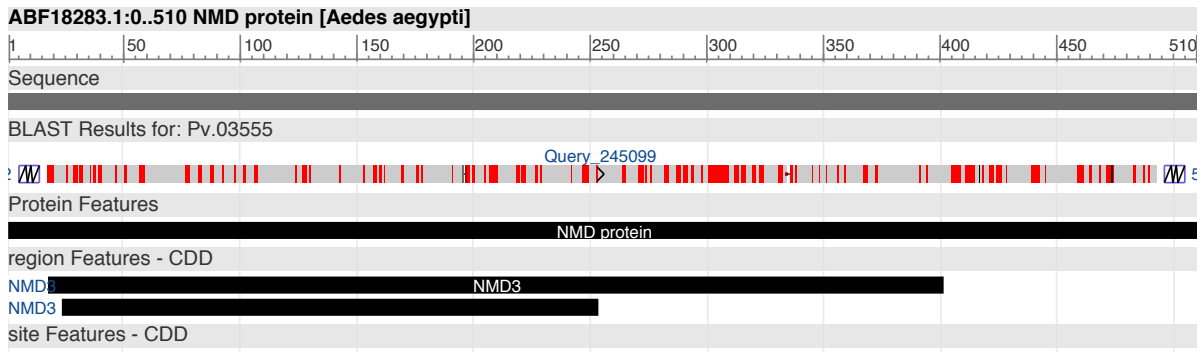

**Supplementary Figure S6.** Alignment of Pv.03555 with the NMD protein. The visualization by MSASviewer included the sequence of a subject gene as “sequence”, the alignment results between the *P. vanderplanki* gene and the subject gene as “BLAST results”, specific regions of the subject gene as “region Features - CDD (Conserved Domain Database)”, and specific sites of the subject gene as “site Features - CDD”. Under “BLAST results”, gaps were represented as thick dark red horizontal lines, insertions as black vertical bars and black arrowheads, and aligned regions as grey bars (match regions) or red bars (mismatch regions). The regions and sites of the subject gene that overlapped with those of the aligned *P. vanderplanki* gene were considered present.

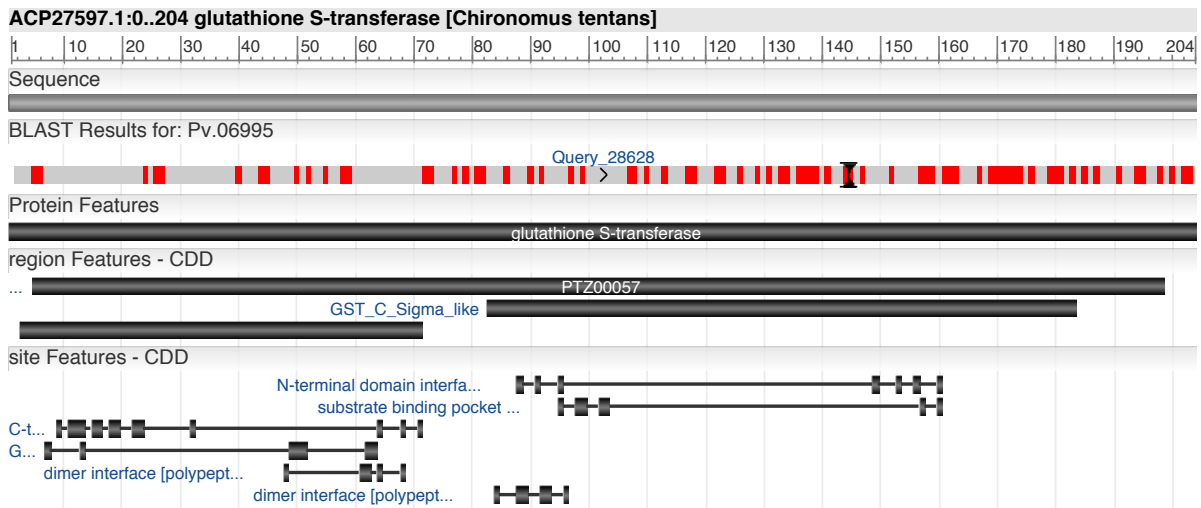

**Supplementary Figure S7.** Alignment of Pv.06995 with glutathione S-transferase.

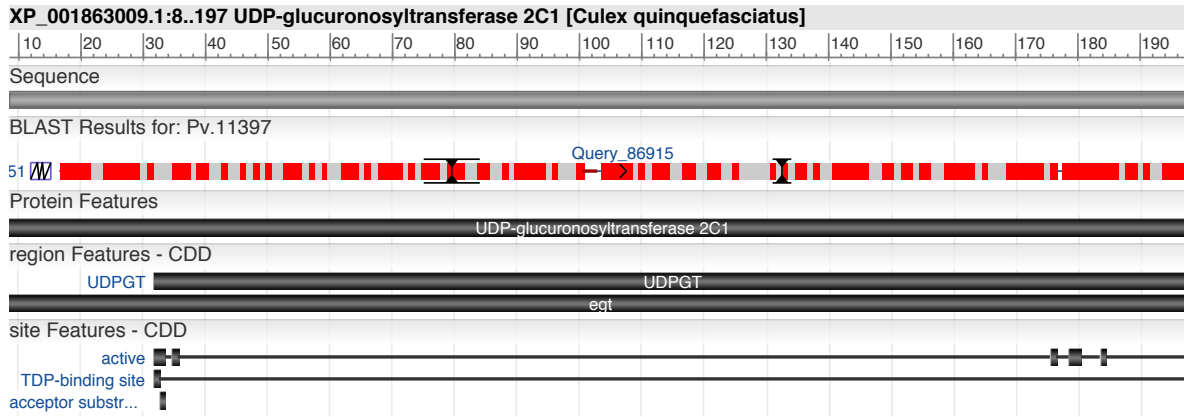

**Supplementary Figure S8.** Alignment of Pv.11397 with UDP-glucuronosyltransferase 2C1.

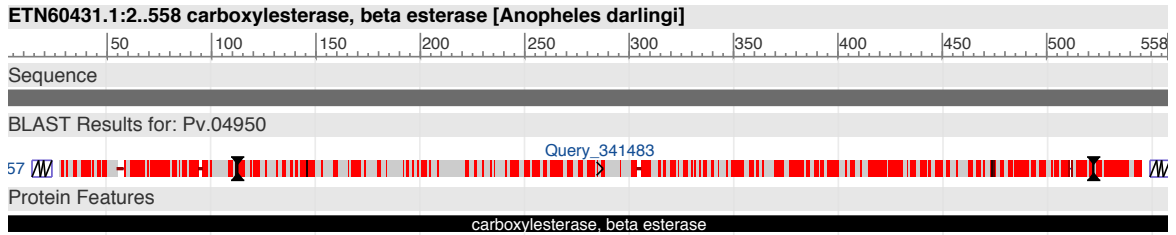

**Supplementary Figure S9.** Alignment of Pv.04950 with carboxylesterase, beta esterase.

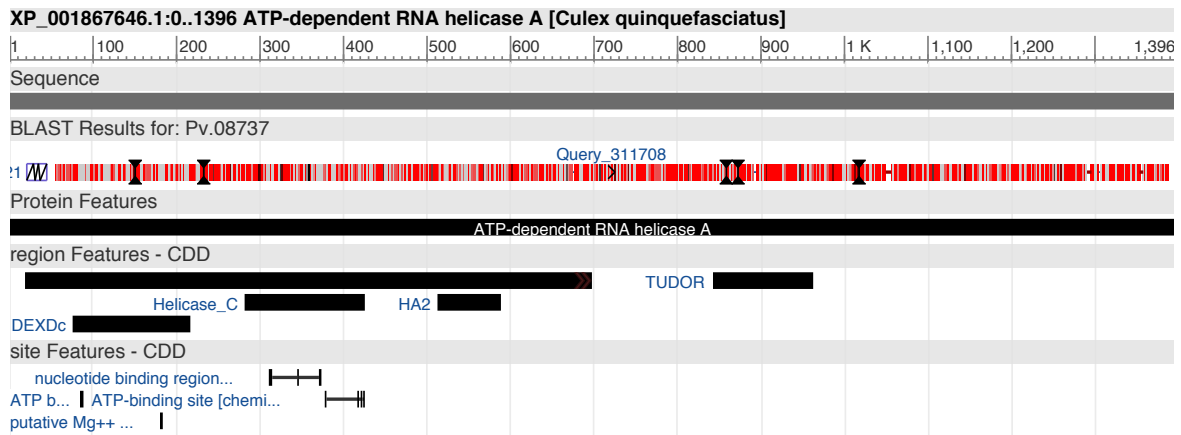

**Supplementary Figure S10.** Alignment of Pv.08737 with ATP-dependent RNA helicase A.

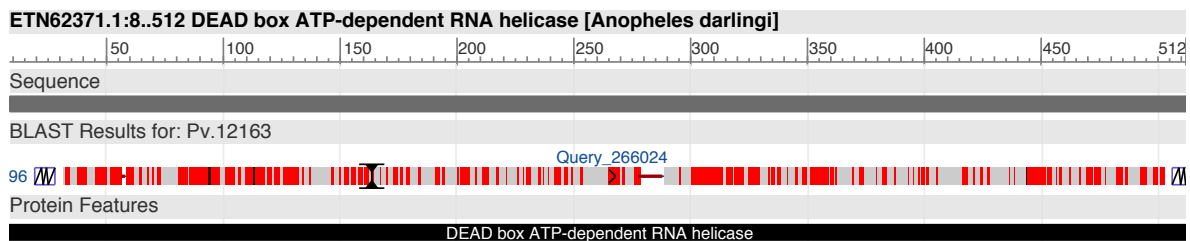

**Supplementary Figure S11.** Alignment of Pv.12163 with DEAD-box ATP-dependent RNA helicase.



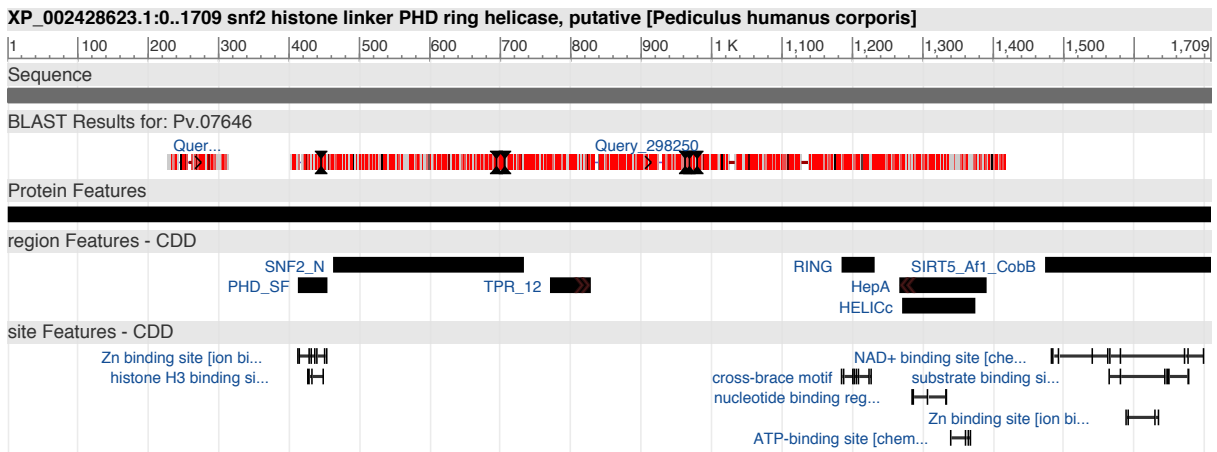

**Supplementary Figure S12.** Alignment of Pv.07646 with SNF2 histone linker PHD-ring helicase, annotated as putatively involved in desuccinylation.

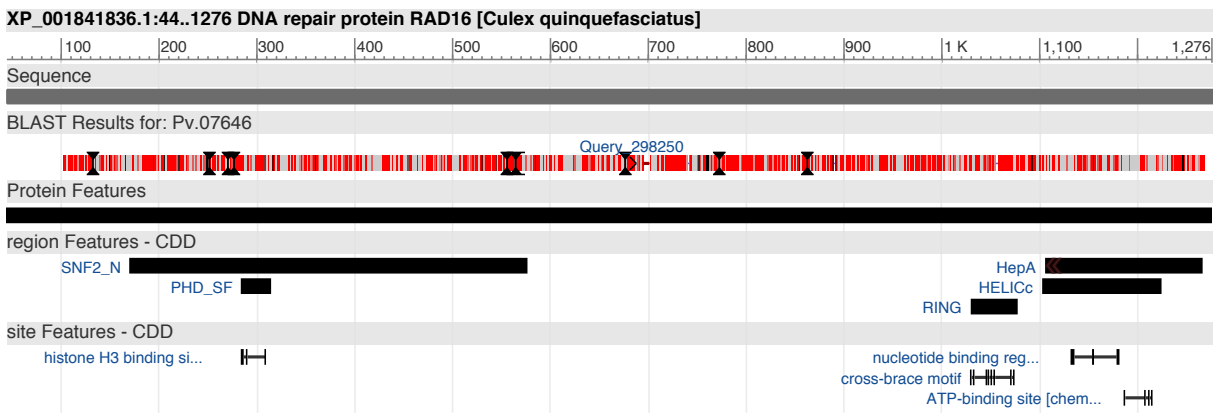

**Supplementary Figure S13.** Alignment Pv.07646 with the DNA-repair protein RAD16.

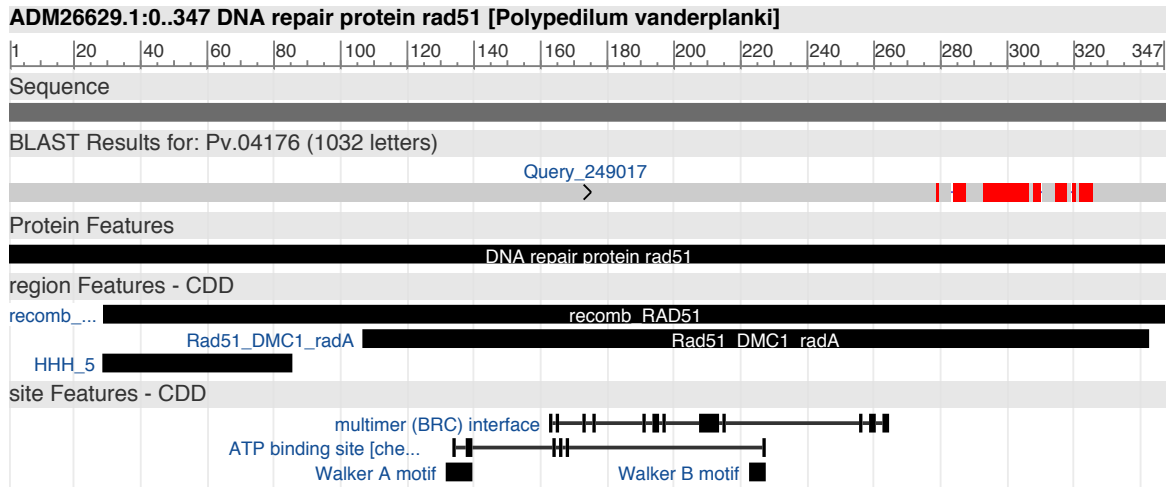

**Supplementary Figure S14.** Alignment of Pv.04176 with the DNA repair protein Rad51.

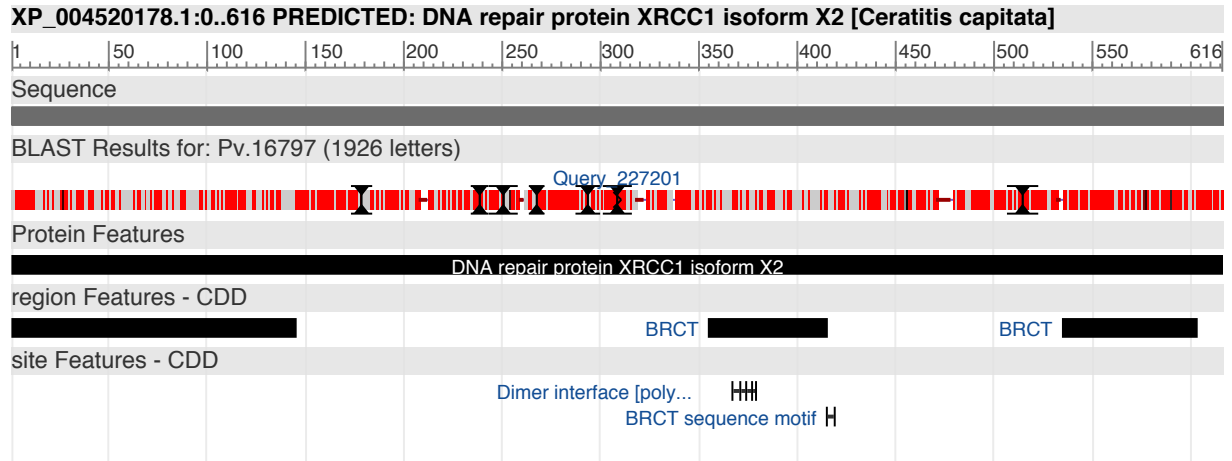

**Supplementary Figure S15.** Alignment of Pv.16797 with the DNA repair protein XRCC1 isoform X2.

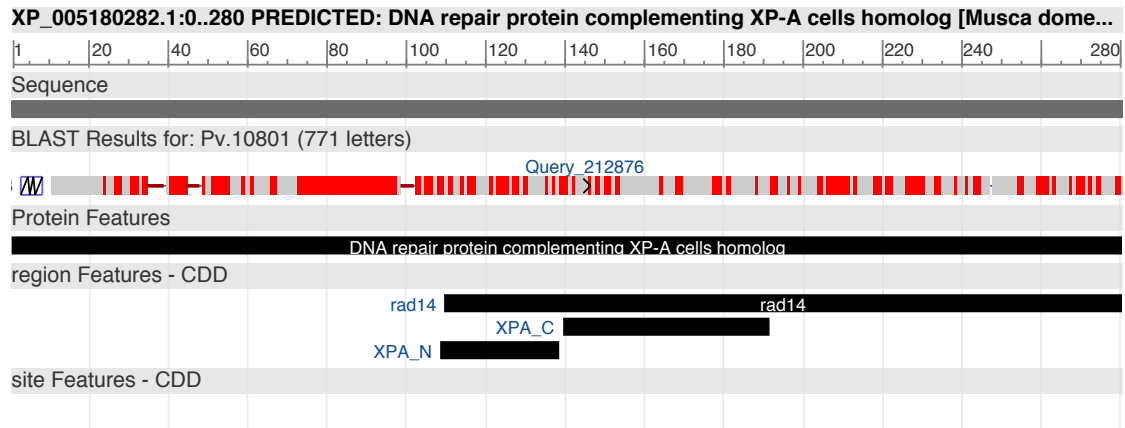

**Supplementary Figure S16.** Alignment of Pv.10801 with the DNA repair protein complementing XP-A cells homolog.

**Supplementary Table S1.** DEGs between D10d and R3.

|                     | PvGene ID | Gene Identifier | BLAST first hit gene                    | E.value   |
|---------------------|-----------|-----------------|-----------------------------------------|-----------|
| Upregulated in R3   | Pv.04891  | 194753680       | GF12734                                 | 1.71E-9   |
|                     | Pv.07646  | 170027903       | DNA repair protein RAD16                | 0.0       |
|                     | Pv.01911  | 765338102       | AAEL005023-PA                           | 1.17E-56  |
|                     | Pv.00327  | 170050025       | conserved hypothetical protein          | 2.20E-61  |
|                     | Pv.08602  | 668455465       | AGAP001139-PA-like protein              | 3.67E-102 |
|                     | Pv.01867  | 157136676       | AAEL013609-PA, partial                  | 0.0       |
|                     | Pv.03099  |                 | No Hits                                 |           |
| Downregulated in R3 | Pv.04558  | 170036404       | conserved hypothetical protein          | 2.62E-107 |
|                     | Pv.08152  |                 | No Hits                                 |           |
|                     | Pv.11244  | 157128927       | AAEL011272-PA, partial                  | 2.15E-126 |
|                     | Pv.13360  | 170052229       | FAM96B                                  | 7.93E-77  |
|                     | Pv.05172  | 157104834       | AAEL004151-PB                           | 4.96E-25  |
|                     | Pv.13909  | 751792306       | PREDICTED: Y+L amino acid transporter 2 | 0.0       |
|                     | Pv.10501  | 170050626       | cyclin b                                | 1.49E-109 |

**Supplementary Table S2.** Enriched GOs in DEGs between D10d and R3 (Fisher's exact test, Benjamini–Hochberg method, FDR<0.05). GO, gene ontology ID; Ont, type of ontology (BP, biological process; MF, molecular function; CC, cellular component).

| Experiment Condition | GO         | GO Description                                                       | Ont | FDR                |
|----------------------|------------|----------------------------------------------------------------------|-----|--------------------|
| D10dvsR3             | GO:0048763 | calcium-induced calcium release activity                             | MF  | 0.0151449737833333 |
|                      | GO:0032237 | activation of store-operated calcium channel activity                | BP  | 0.0151449737833333 |
|                      | GO:0030478 | actin cap                                                            | CC  | 0.0151449737833333 |
|                      | GO:0070252 | actin-mediated cell contraction                                      | BP  | 0.0151449737833333 |
|                      | GO:0036054 | protein-malonyllysine demalonylase activity                          | MF  | 0.0151449737833333 |
|                      | GO:0036055 | protein-succinyllysine desuccinylase activity                        | MF  | 0.0151449737833333 |
|                      | GO:0036047 | peptidyl-lysine demalonylation                                       | BP  | 0.0151449737833333 |
|                      | GO:0036049 | peptidyl-lysine desuccinylation                                      | BP  | 0.0151449737833333 |
|                      | GO:0005826 | actomyosin contractile ring                                          | CC  | 0.0302127188827813 |
|                      | GO:0030589 | pseudocleavage involved in syncytial blastoderm formation            | BP  | 0.0367338112067659 |
|                      | GO:0090254 | cell elongation involved in imaginal disc-derived wing morphogenesis | BP  | 0.0367338112067659 |
|                      | GO:0045495 | pole plasm                                                           | CC  | 0.0367338112067659 |
|                      | GO:0045178 | basal part of cell                                                   | CC  | 0.0385983590140961 |
|                      | GO:0017146 | N-methyl-D-aspartate selective glutamate receptor complex            | CC  | 0.0385983590140961 |
|                      | GO:0051533 | positive regulation of NFAT protein import into nucleus              | BP  | 0.0401298171424475 |
|                      | GO:0018345 | protein palmitoylation                                               | BP  | 0.0401298171424475 |
|                      | GO:0007377 | germ-band extension                                                  | BP  | 0.0401298171424475 |
|                      | GO:0070403 | NAD+ binding                                                         | MF  | 0.0401298171424475 |
|                      | GO:0035186 | syncytial blastoderm mitotic cell cycle                              | BP  | 0.0401298171424475 |
|                      | GO:0004972 | N-methyl-D-aspartate selective glutamate receptor activity           | MF  | 0.0401298171424475 |
|                      | GO:0007059 | chromosome segregation                                               | BP  | 0.0401298171424475 |
|                      | GO:0007370 | ventral furrow formation                                             | BP  | 0.0422451376177311 |
|                      | GO:0000775 | chromosome, centromeric region                                       | CC  | 0.0422451376177311 |
|                      | GO:0051233 | spindle midzone                                                      | CC  | 0.0422451376177311 |
|                      | GO:0000086 | G2/M transition of mitotic cell cycle                                | BP  | 0.0422451376177311 |
|                      | GO:0006412 | translation                                                          | BP  | 0.0427362647342411 |
|                      | GO:0019706 | protein-cysteine S-palmitoyltransferase activity                     | MF  | 0.046899415605028  |
|                      | GO:0031532 | actin cytoskeleton reorganization                                    | BP  | 0.046899415605028  |
|                      | GO:0035025 | positive regulation of Rho protein signal transduction               | BP  | 0.046899415605028  |
|                      | GO:0003735 | structural constituent of ribosome                                   | MF  | 0.046899415605028  |
|                      | GO:0016226 | iron-sulfur cluster assembly                                         | BP  | 0.046899415605028  |
|                      | GO:0050770 | regulation of axonogenesis                                           | BP  | 0.0484208269709028 |
|                      | GO:0016328 | lateral plasma membrane                                              | CC  | 0.0488578254290042 |
|                      | GO:0016476 | regulation of embryonic cell shape                                   | BP  | 0.0488578254290042 |

**Supplementary Table S3.** Preprocessing and mapping. Samples were prepared in biological triplicate. totalSequences, number of sequenced reads; tooShort, number of reads shorter than 14 base pairs; tooManyN, number of reads containing more than 2 N bases; totalPassed, tooShort and tooManyN subtracted from totalSequences; mapped, number of reads mapped to the *P. vanderplanki* genome; unmapped, number of reads not mapped to the same genome; MappingRate, proportion of mapped reads among all passed reads.

|              | Preprocess Result |          |          |             | Mapping Result |          |             |
|--------------|-------------------|----------|----------|-------------|----------------|----------|-------------|
|              | totalSequences    | tooShort | tooManyN | totalPassed | mapped         | unmapped | MappingRate |
| T0-Sample1   | 9329152           | 1089685  | 33       | 8239434     | 1682490        | 6556944  | 20.4        |
| T0-Sample2   | 8618767           | 1642930  | 23       | 6975814     | 2463740        | 4512074  | 35.3        |
| T0-Sample3   | 5486398           | 1002516  | 12       | 4483870     | 1517136        | 2966734  | 33.8        |
| T48-Sample1  | 8249645           | 907419   | 27       | 7342199     | 1282918        | 6059281  | 17.5        |
| T48-Sample2  | 4527055           | 923602   | 9        | 3603444     | 1340121        | 2263323  | 37.2        |
| T48-Sample3  | 5862177           | 1172255  | 20       | 4689902     | 1747773        | 2942129  | 37.3        |
| D8-Sample1   | 7162127           | 867901   | 23       | 6294203     | 1263235        | 5030968  | 20.1        |
| D8-Sample2   | 5497776           | 914899   | 15       | 4582862     | 1384844        | 3198018  | 30.2        |
| D8-Sample3   | 4710977           | 789877   | 19       | 3921081     | 1214370        | 2706711  | 31.0        |
| D10d-Sample1 | 9786341           | 972550   | 49       | 8813742     | 1410369        | 7403373  | 16.0        |
| D10d-Sample2 | 5046272           | 887863   | 13       | 4158396     | 1358339        | 2800057  | 32.7        |
| D10d-Sample3 | 6176969           | 1146552  | 21       | 5030396     | 1716458        | 3313938  | 34.1        |
| R3-Sample1   | 2269038           | 431391   | 3        | 1837644     | 687580         | 1150064  | 37.4        |
| R3-Sample2   | 1966504           | 340563   | 6        | 1625935     | 533487         | 1092448  | 32.8        |
| R3-Sample3   | 4409262           | 614660   | 6        | 3794596     | 1188580        | 2606016  | 31.3        |
| R24-Sample1  | 3580658           | 819575   | 8        | 2761075     | 1228917        | 1532158  | 44.5        |
| R24-Sample2  | 5913507           | 1330397  | 16       | 4583094     | 2078353        | 2504741  | 45.3        |
| R24-Sample3  | 5071881           | 1122334  | 14       | 3949533     | 1752922        | 2196611  | 44.4        |
